# Supplementary material
Source: PubMed Central journal article supplement (PMC5626587)

# Supplementary Figure S1

**a**

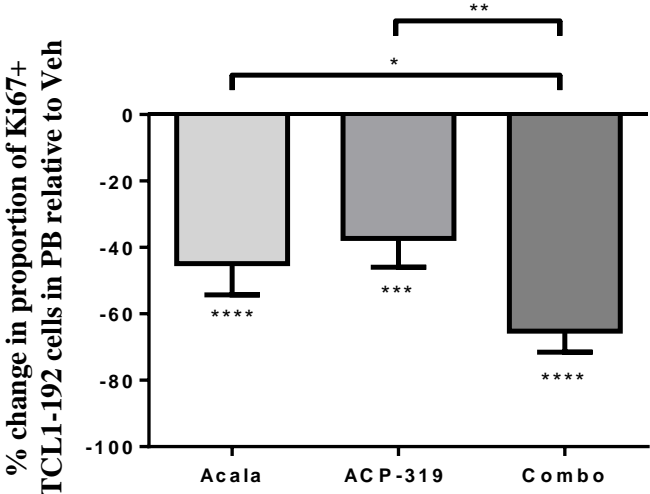

**b**

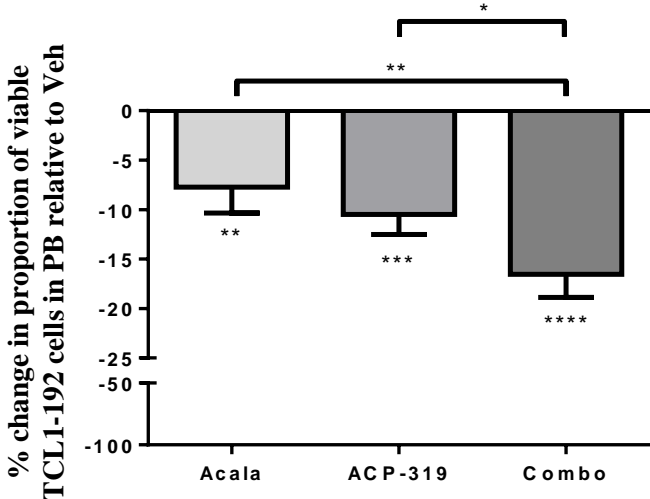

# Supplementary Figure S2

**a**

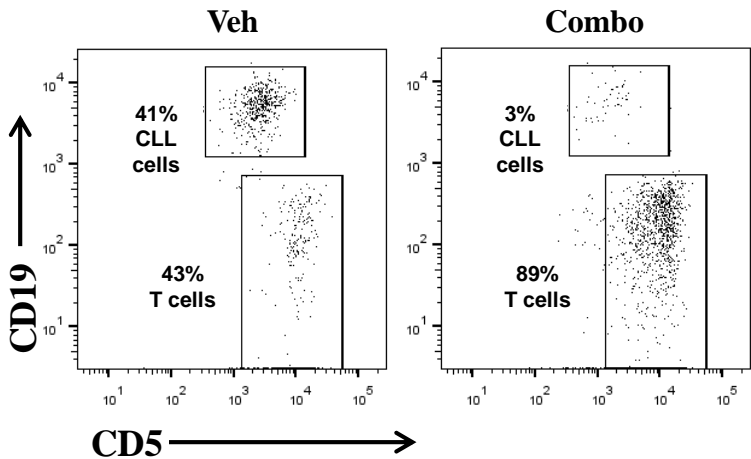

**b**

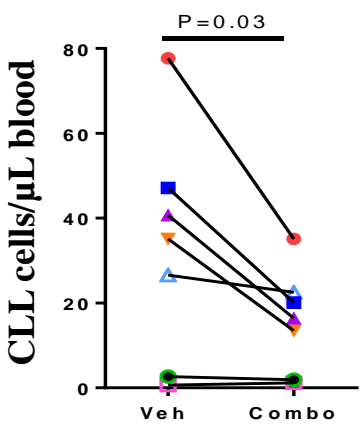

**c**

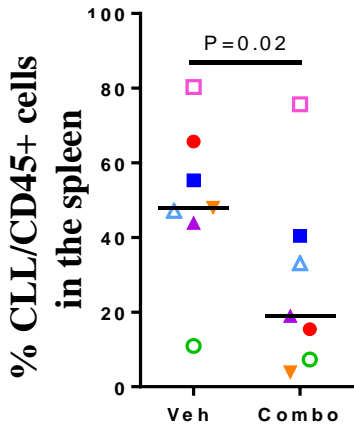

**d**

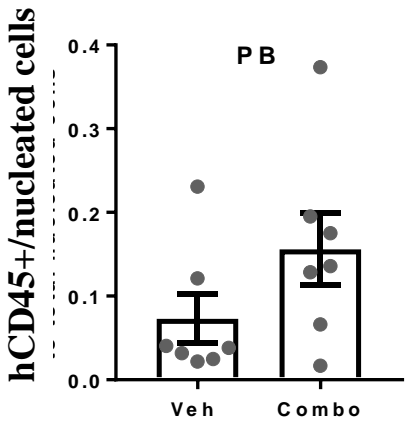

**e**

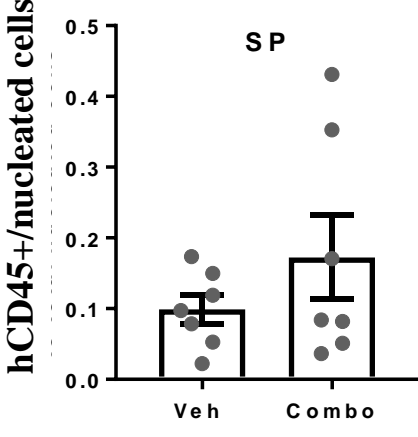

**f**

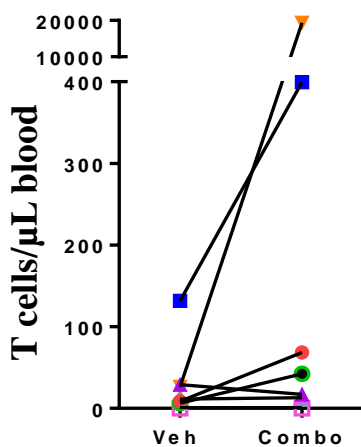

**g**

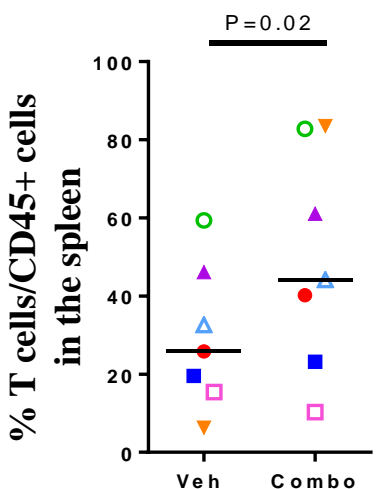

# Supplementary Figure S3

**a**

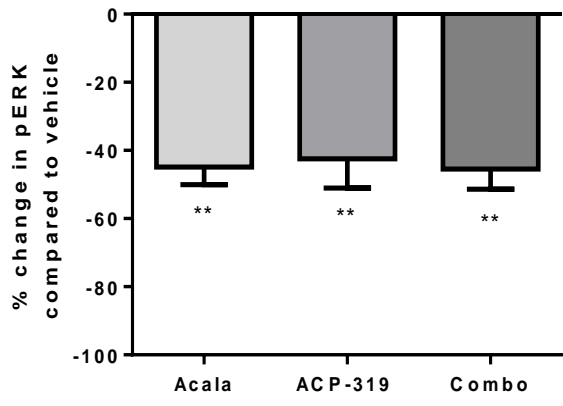

**b**

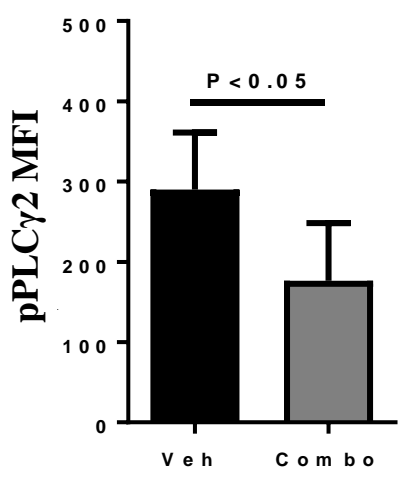

**c**

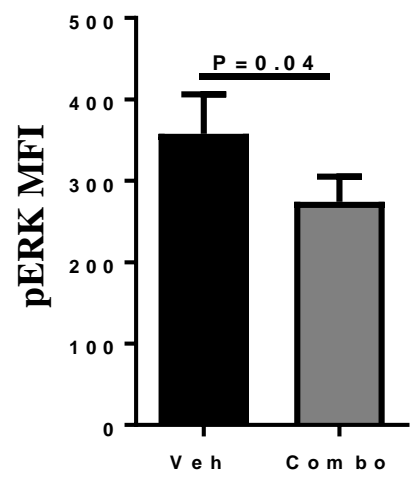

# Supplementary Figure S4

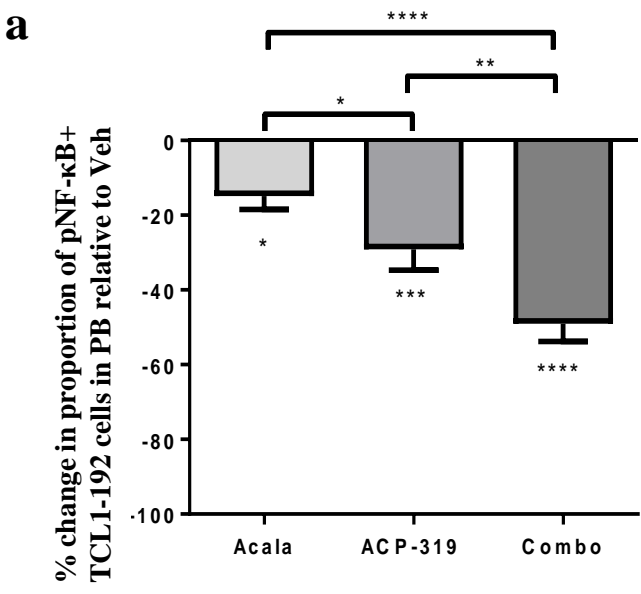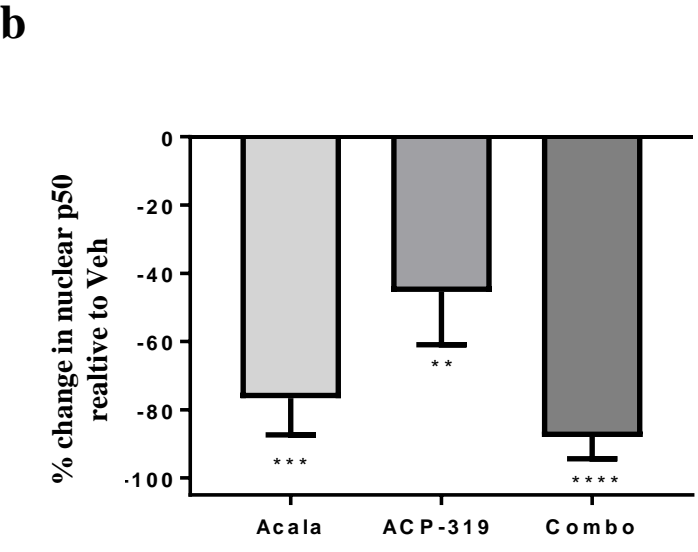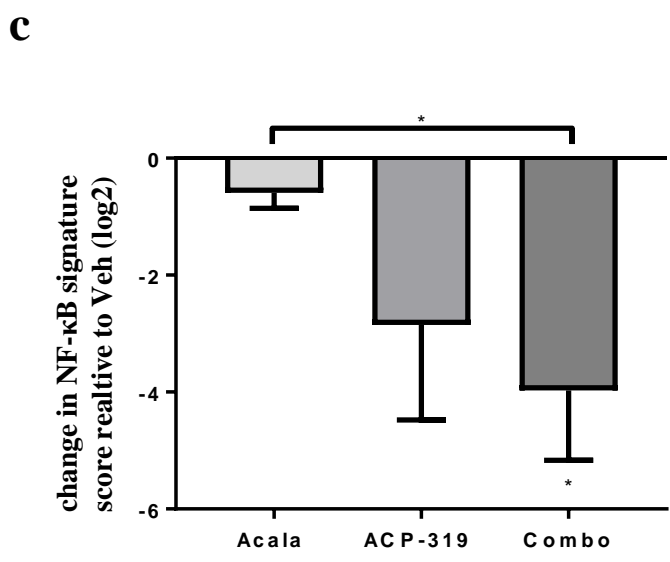

Supplement: NIHMS888128-supplement-2.pdf [file NIHMS888128-supplement-2.pdf]
